# Supplementary material for: Efficient light-induced reactive oxygen species production from a far-red ER-targeting BODIPY dye
Source: Royal Society of Chemistry journal article supplement (doi:10.1039/d4ra05603e), 2024-01-01
Supplement: d4ra05603e1.pdf [file d4ra05603e1.pdf]

## Electronic Supplementary Information

### **Efficient Light-Induced Production of Reactive Oxygen Species from a Far-Red ER-Targeting BODIPY Dye**

Shawn Swavey,\* Arnaud Quentel, Matthew Grzesiak, Cate Hawkins, Pierre-Alexandre Vidi<sup>‡</sup>

\*University of Dayton, 300 College Park, Dayton, OH. 45469

<sup>‡</sup>Laboratoire InGenO, Institut de Cancérologie de l'Ouest, Angers, 49055, France

\*email : [sswavey1@udayton.edu](mailto:sswavey1@udayton.edu)

## Table of contents

|                                         |       |
|-----------------------------------------|-------|
| S1 Characterization .....               | 3     |
| Proton NMR .....                        | 3     |
| High Resolution Mass Spectroscopy ..... | 4     |
| S2 Electronic Spectroscopy.....         | 5     |
| S3 ROS Studies.....                     | 6-13  |
| S5 Cell Studies .....                   | 14-16 |

## Characterization

### BDP-1I

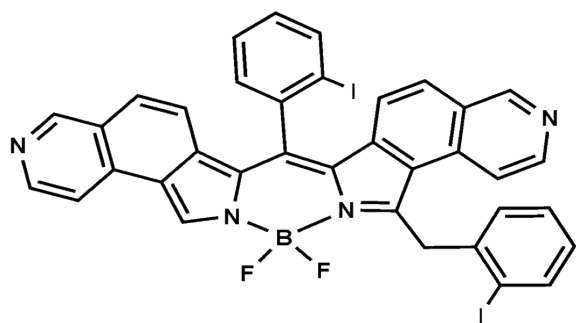

### BDP-1I

### $^1\text{H}$ NMR ( $\text{CDCl}_3$ )

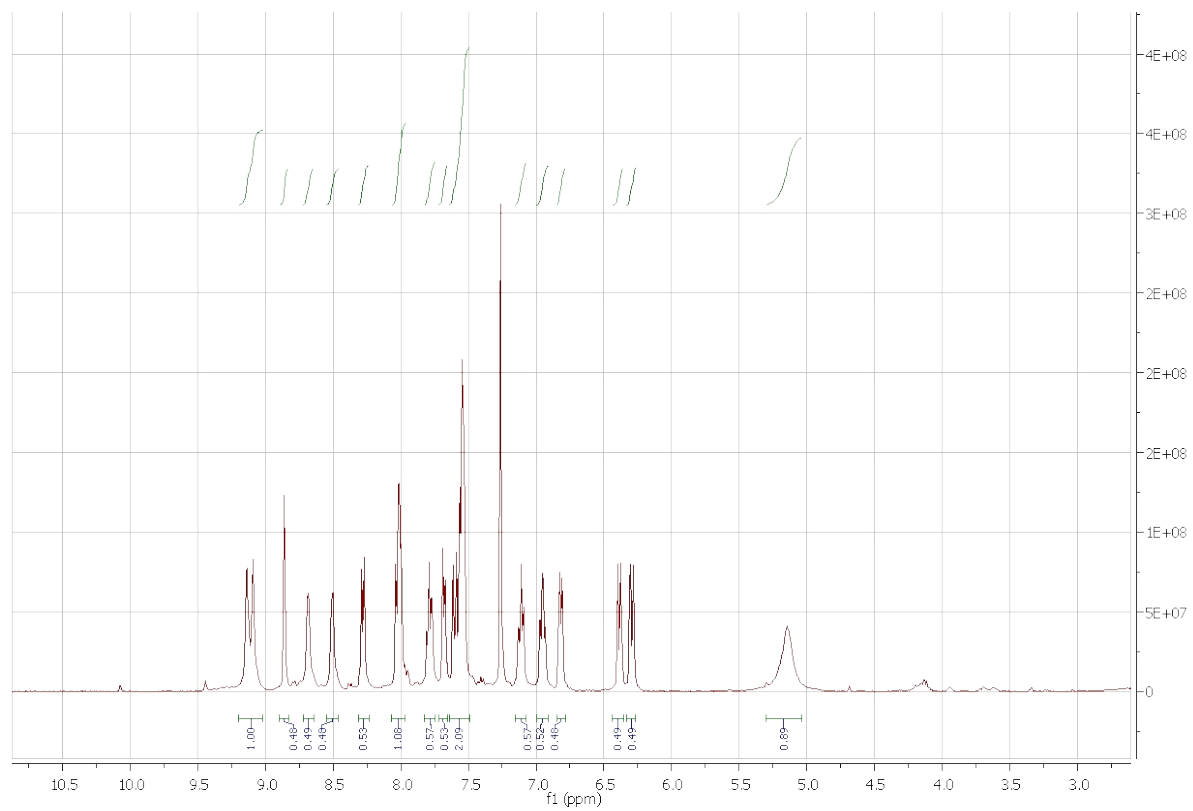

# HRMS

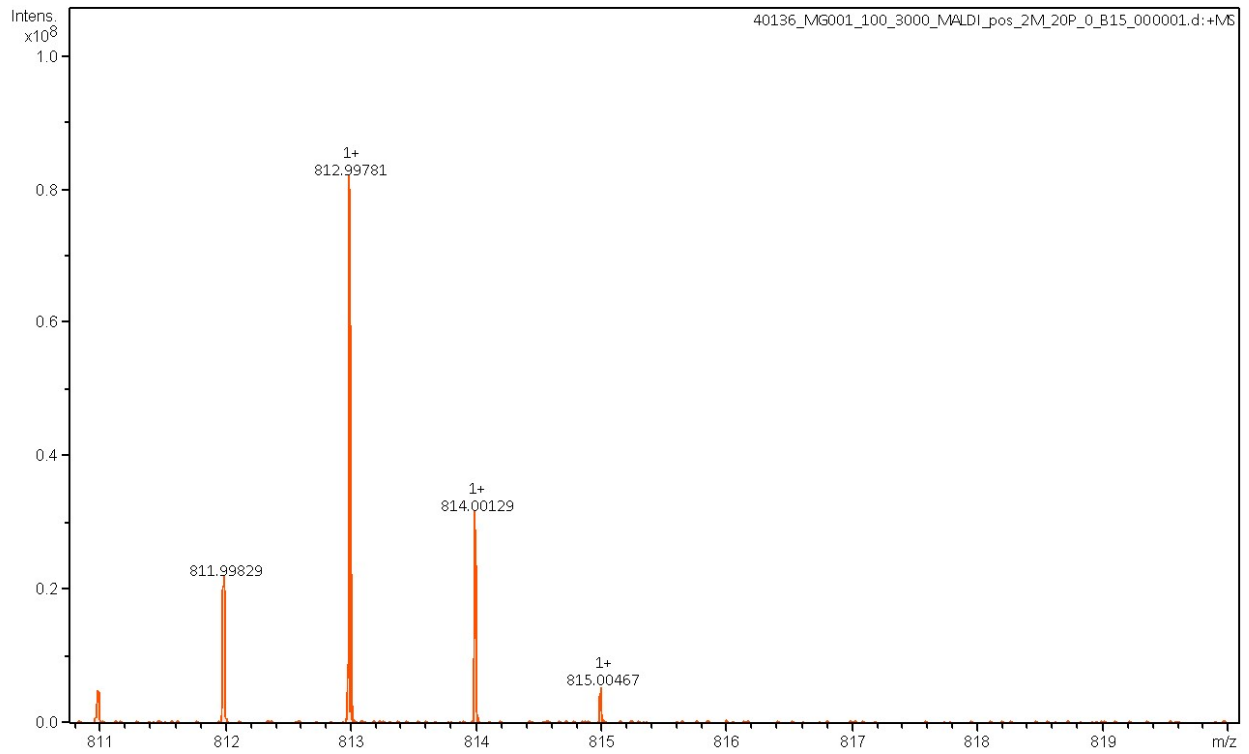

## Electronic Spectroscopy

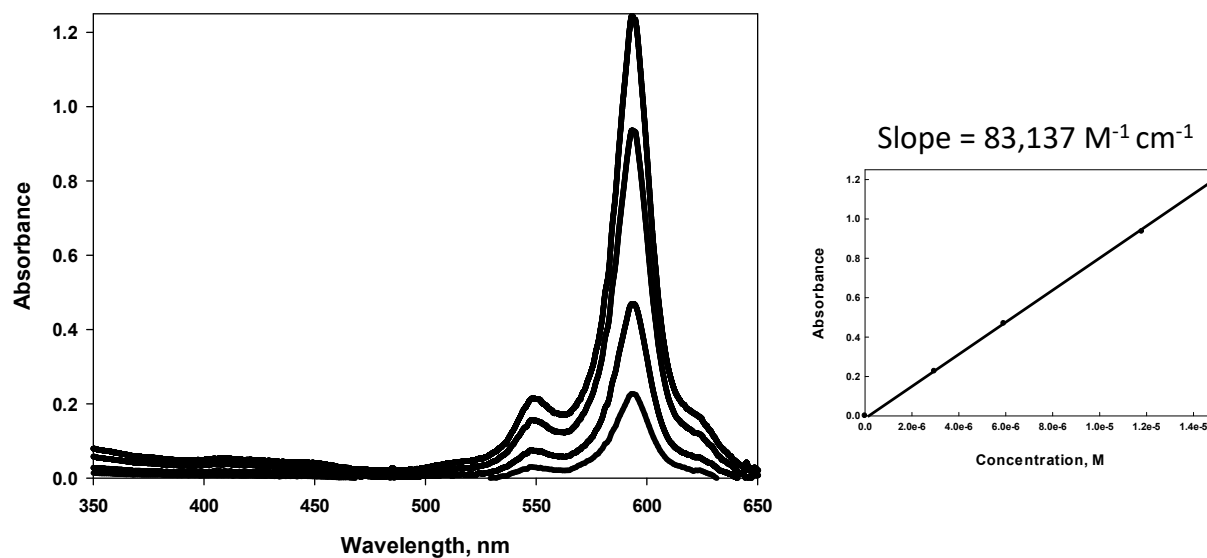

Figure S1: Beers-Law plot for **BDP-11** in DCM (298 K).

# Singlet Oxygen Quantum Yield: DPBF studies

## DPBF Results for BDP-1I

### Run 1

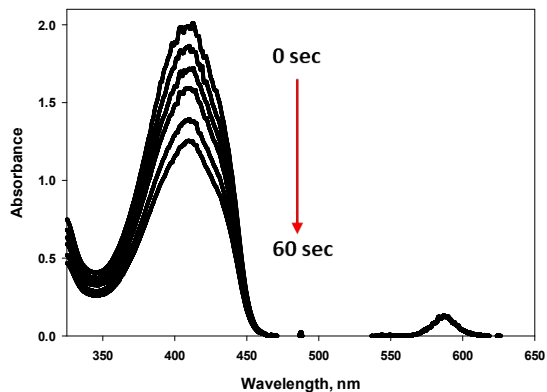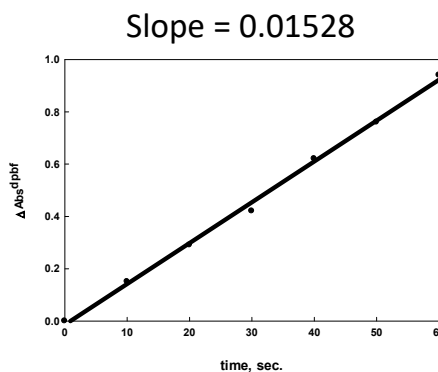

### Run 2

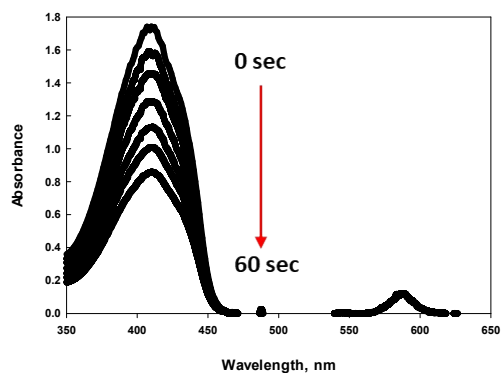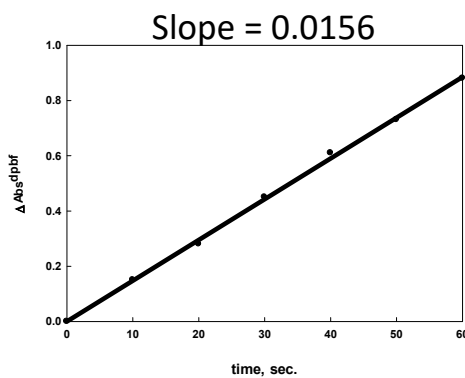

### Run 3

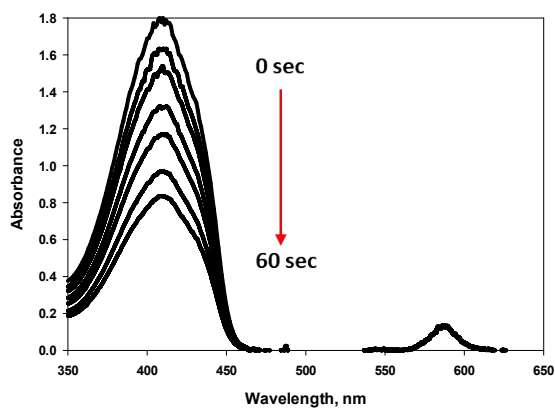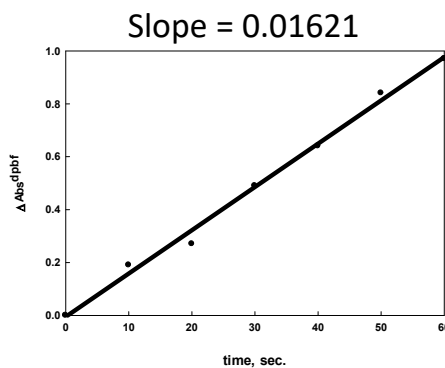

**Figure S2.** Acetonitrile DPBF and BDP-1I solutions irradiated with a 300 W mercury arc lamp equipped with a 550 nm long band-pass filter.

## DPBF results for BDP-1

### Run 1

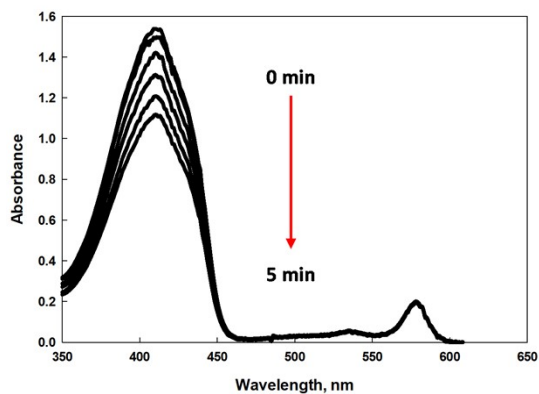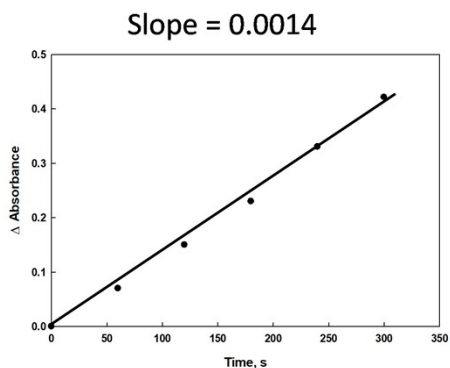

### Run 2

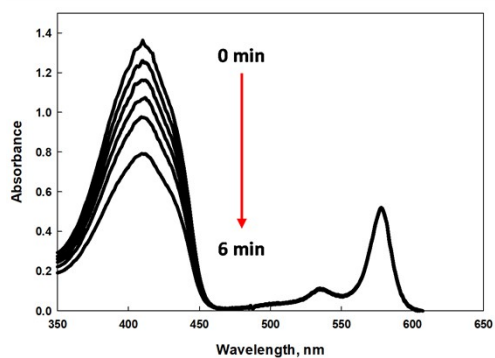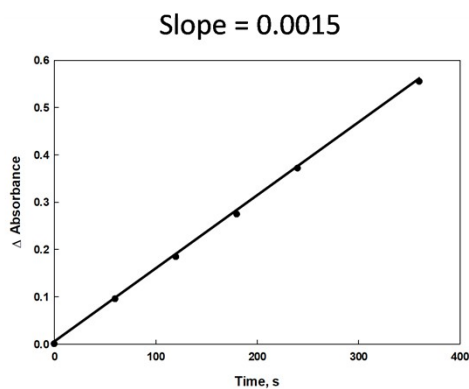

### Run 3

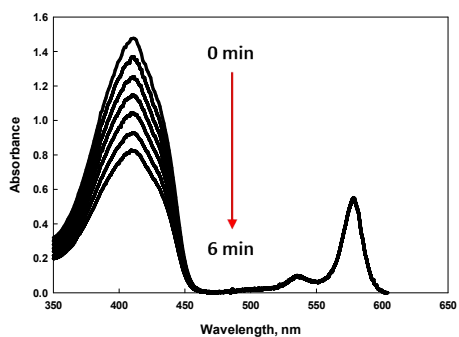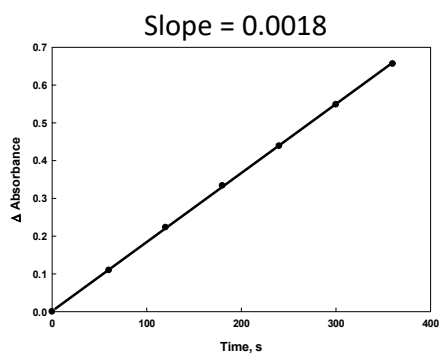

**Figure S3.** Acetonitrile DPBF and BDP-1 solutions irradiated with a 300 W mercury arc lamp equipped with a 550 nm long band-pass filter.

## DPBF Results for Rose Bengal (RB)

### Run 1

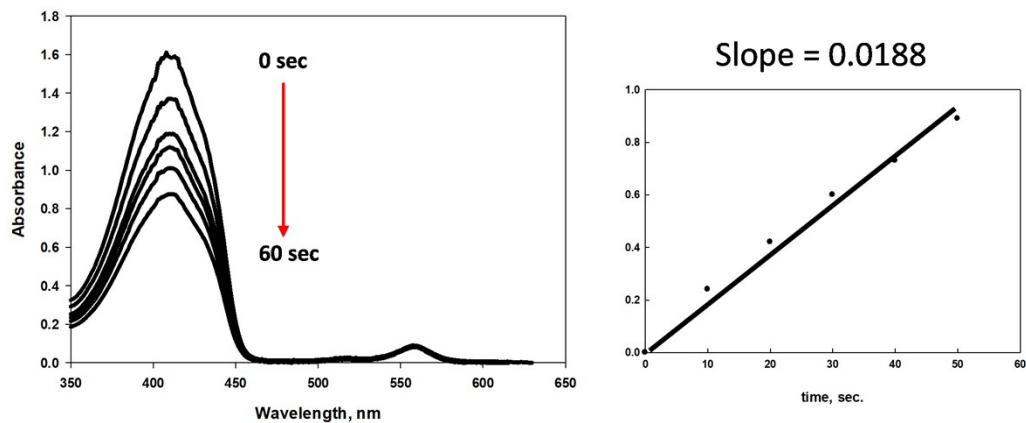

### Run 2

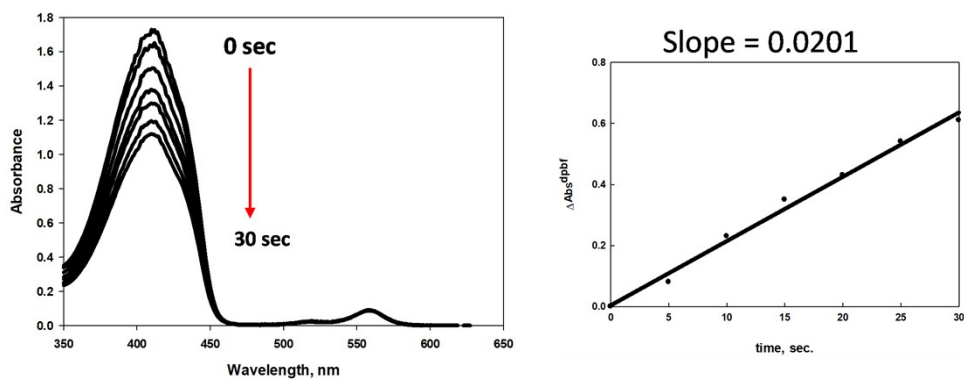

### Run 3

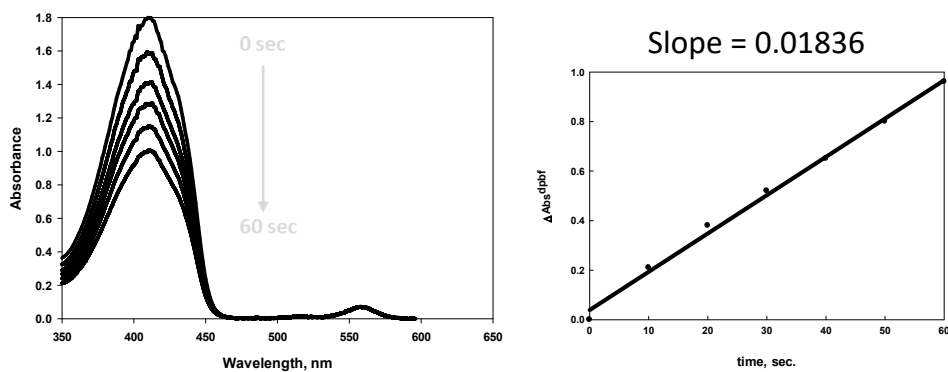

**Figure S4.** Acetonitrile DPBF and RB solutions irradiated with a 300 W mercury arc lamp equipped with a 550 nm long band-pass filter. Irradiation time for run 1 was 0-30 sec, while runs 2 and 3 were irradiated for a total of 60 sec.



## ABDA $^1\text{O}_2$ Quantum Yield Measurement

### RB ABDA Run 1

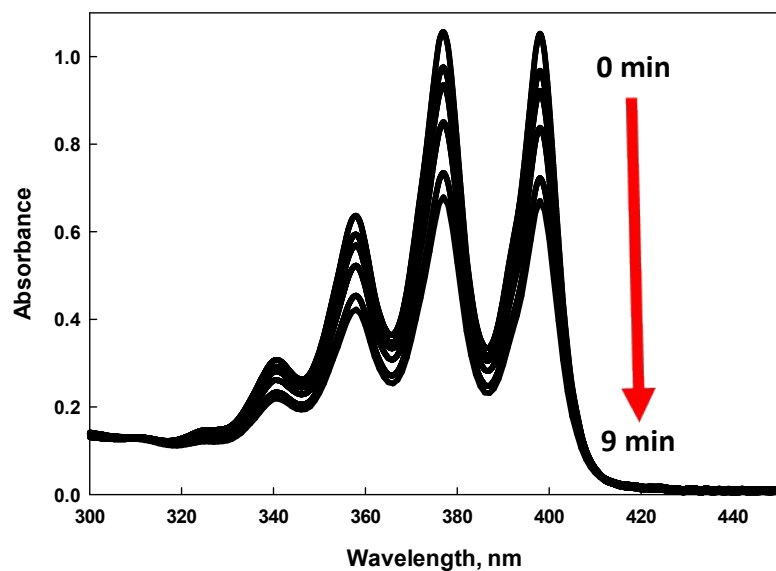

### RB ABDA run 2

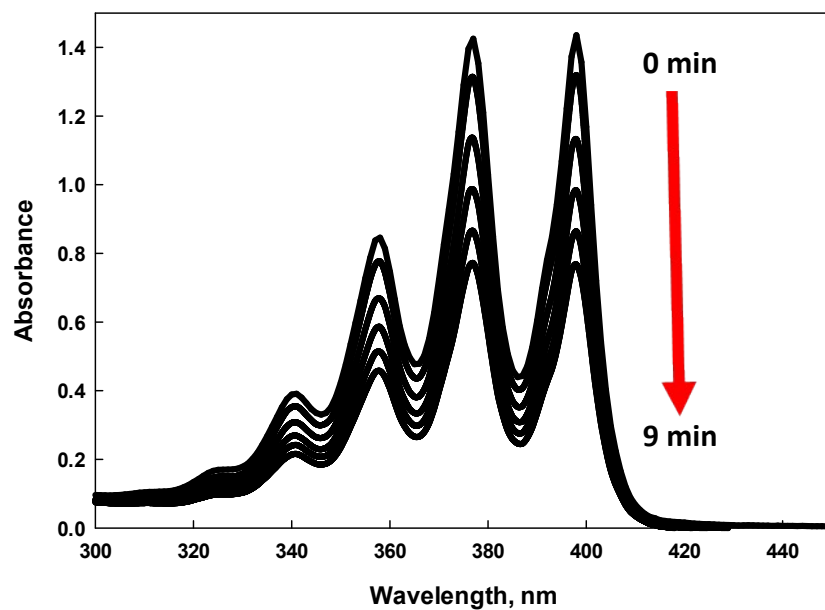

**Fig. S5.** Electronic spectra of acetonitrile solution of the singlet oxygen scavenger (ABDA) and RB after irradiation with 300 W lamp equipped with a 550 nm long band-pass filter.

**BDP-1I ABDA Run 1**

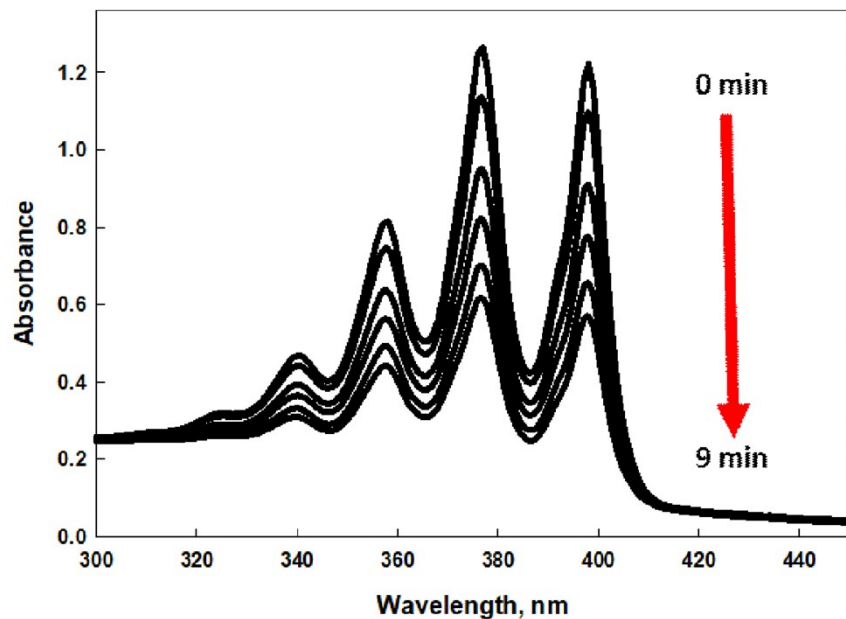

**BDP-1I ABDA Run 2**

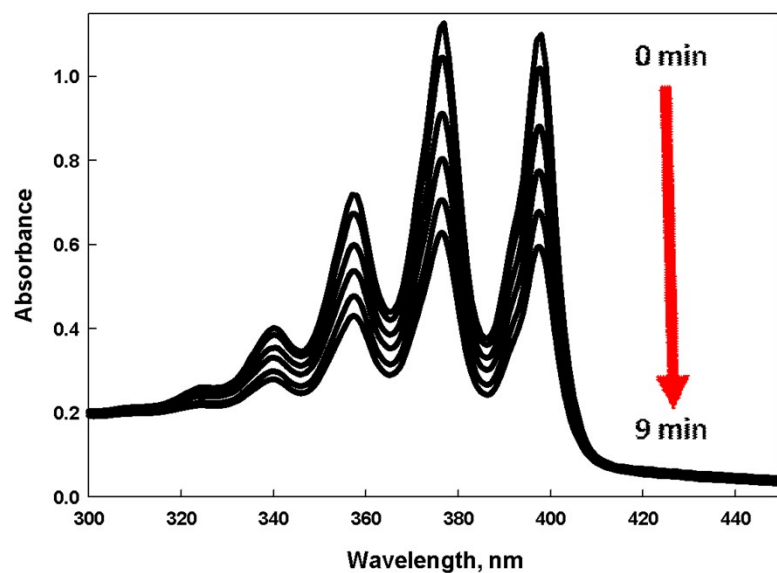

**Fig. S6.** Electronic spectra of acetonitrile solution of the singlet oxygen scavenger (ABDA) and **BDP-1I** after irradiation with 300 W lamp equipped with a 550 nm long band-pass filter.

### BDP-1 ABDA Run 1

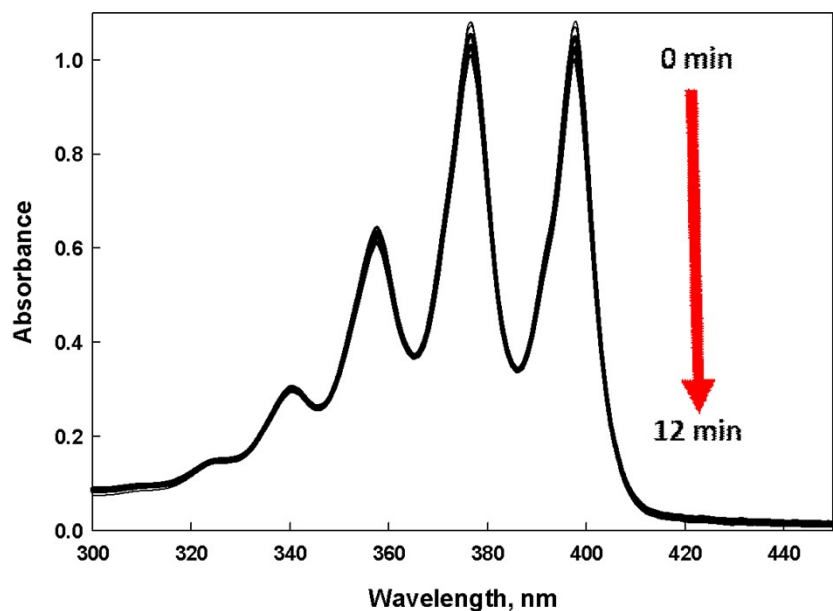

### BDP-1 ABDA Run 2

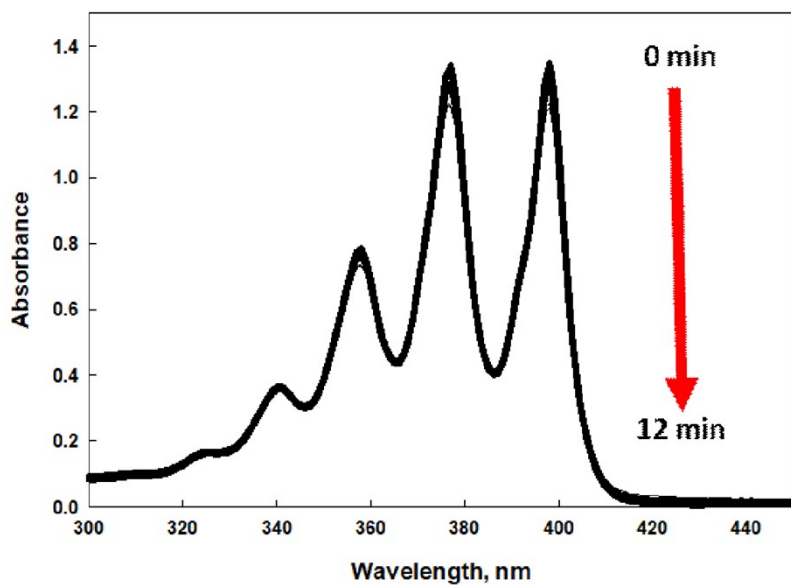

**Fig. S7.** Electronic spectra of acetonitrile solution of the singlet oxygen scavenger (ABDA) and **BDP-1** after irradiation with 300 W lamp equipped with a 550 nm long band-pass filter.

## Procedure for Superoxide Production.

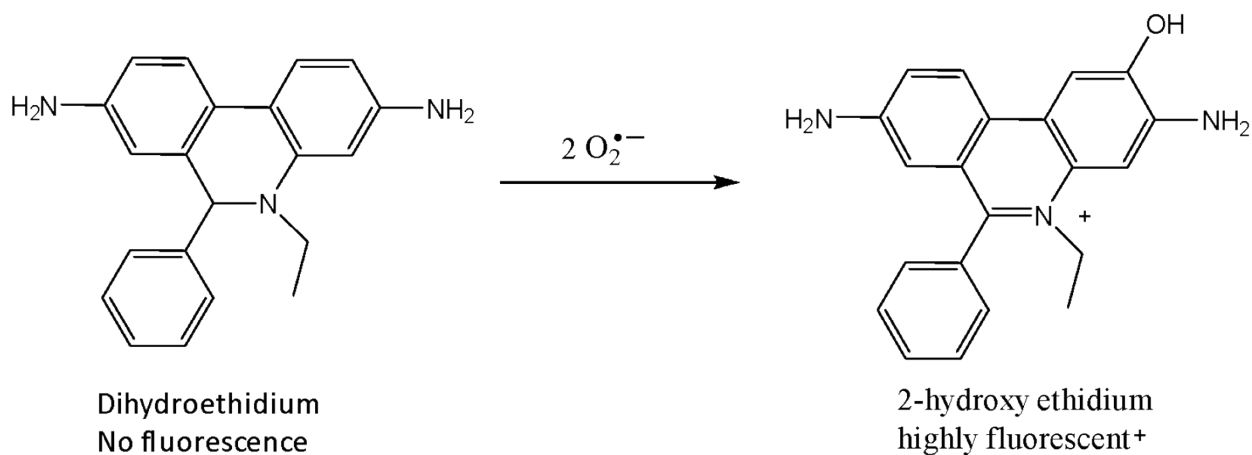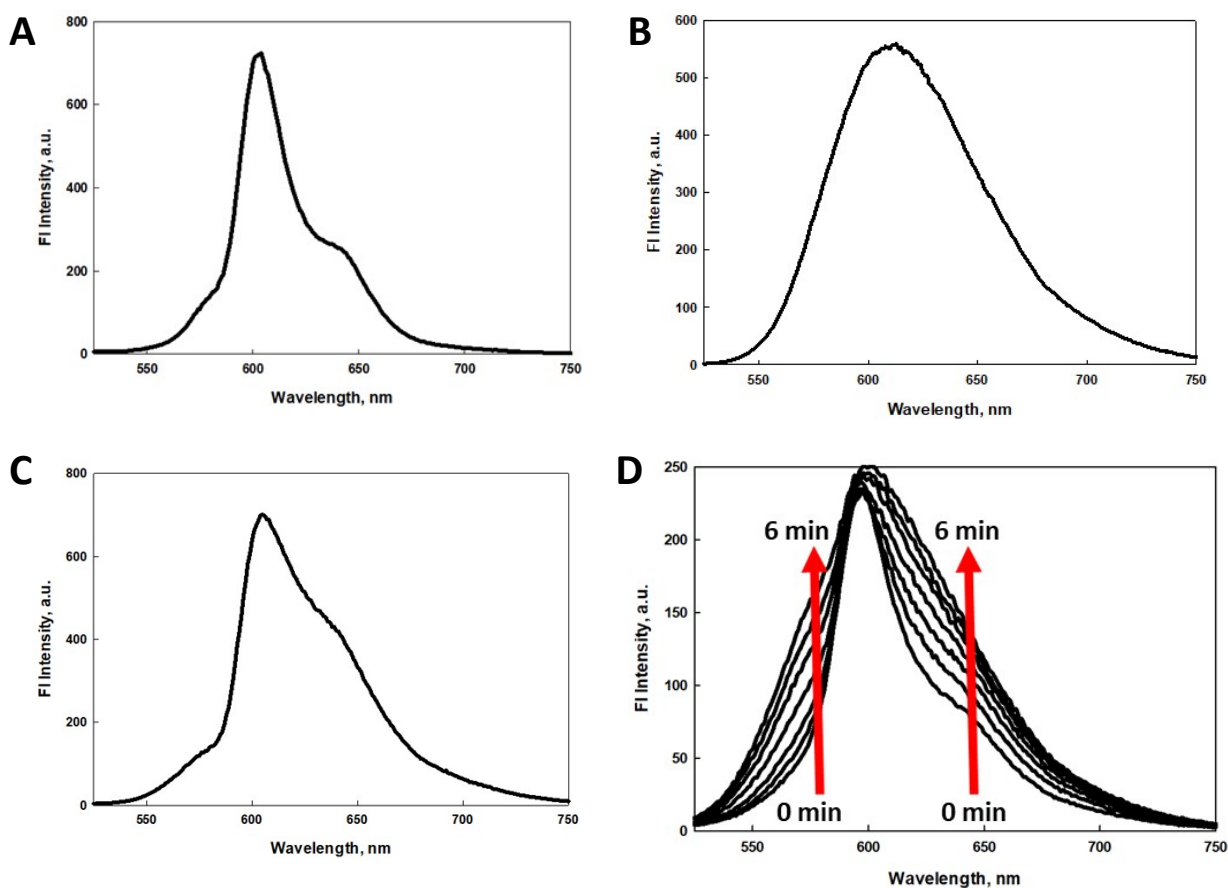

**Fig. S8.** **A.** Emission spectra of an acetonitrile solution of **BDP-1I** ( $\lambda_{\text{exc}} = 500 \text{ nm}$ ). **B.** Emission spectra of an acetonitrile solution of ethidium bromide ( $\lambda_{\text{exc}} = 500 \text{ nm}$ ). **C.** Emission spectrum of an acetonitrile solution of ethidium bromide and **BDP-1I** ( $\lambda_{\text{exc}} = 500$

nm). **D.** Emission spectra of DHE/**BDP-1** as a function of irradiation with a 300 W mercury arc lamp equipped with a 550 nm long band-pass filter.

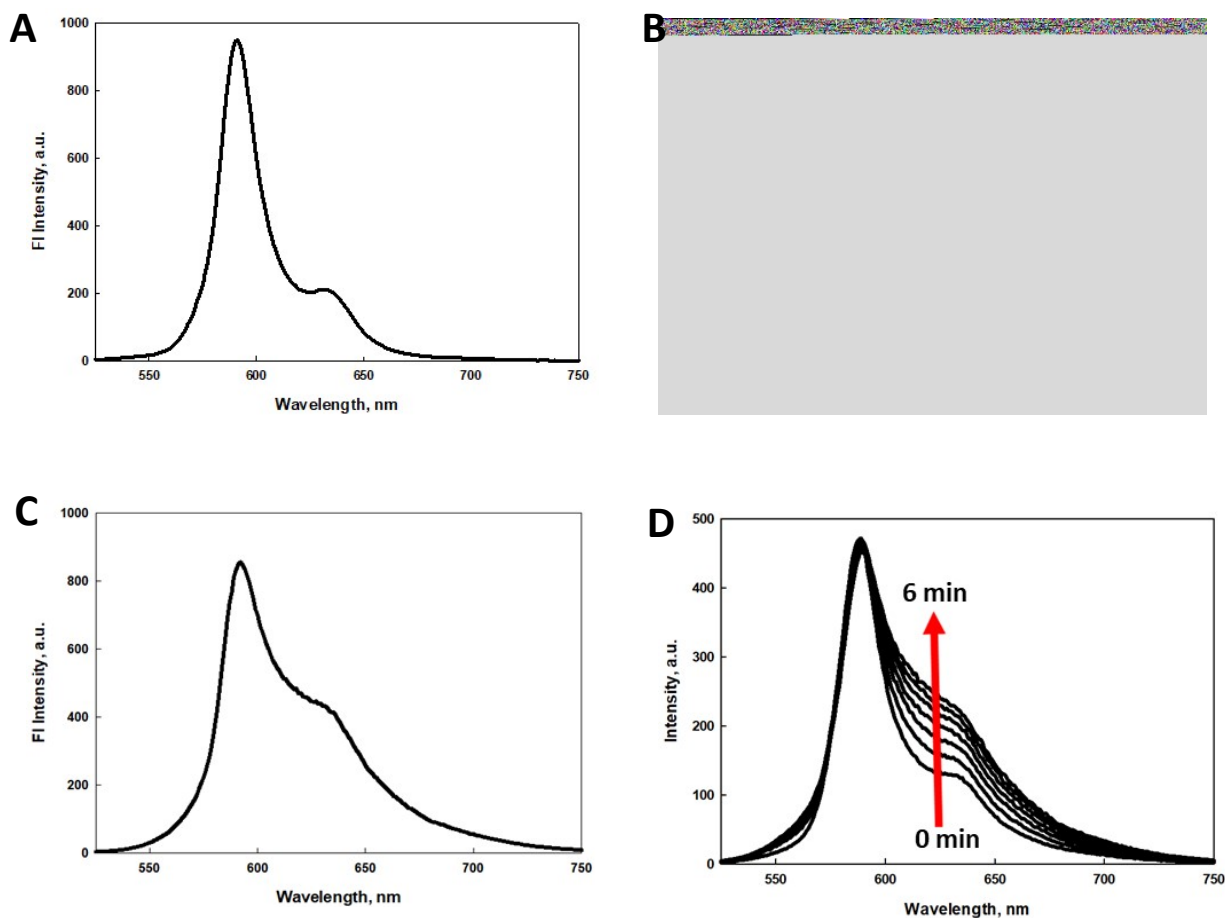

**Fig. S9.** **A.** Emission spectra of an acetonitrile solution of **BDP-1** ( $\lambda_{\text{exc}} = 500$  nm). **B.** Emission spectra of an acetonitrile solution of ethidium bromide ( $\lambda_{\text{exc}} = 500$  nm). **C.** Emission spectrum of an acetonitrile solution of ethidium bromide and **BDP-1** ( $\lambda_{\text{exc}} = 500$  nm). **D.** Emission spectra of DHE/**BDP-1** as a function of irradiation with a 300 W mercury arc lamp equipped with a 550 nm long band-pass filter.

## S5 Cell Studies

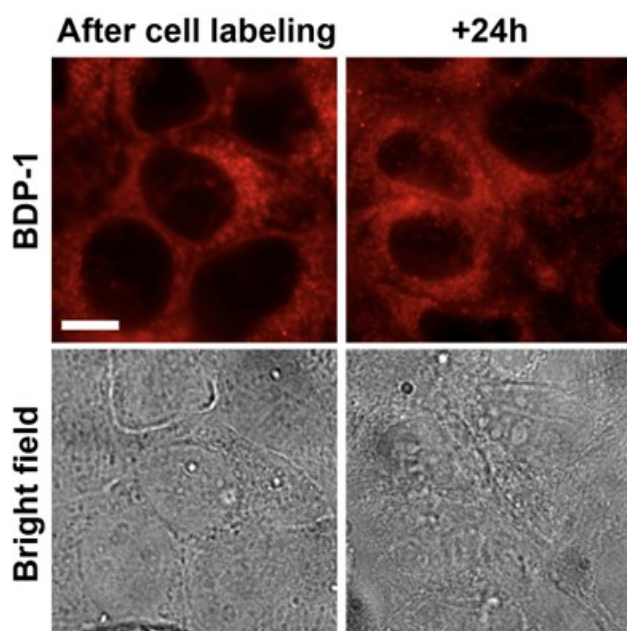

**Fig. S10.** BDP-1 staining is retained in breast epithelial cells. Scale bar, 10  $\mu\text{m}$ .

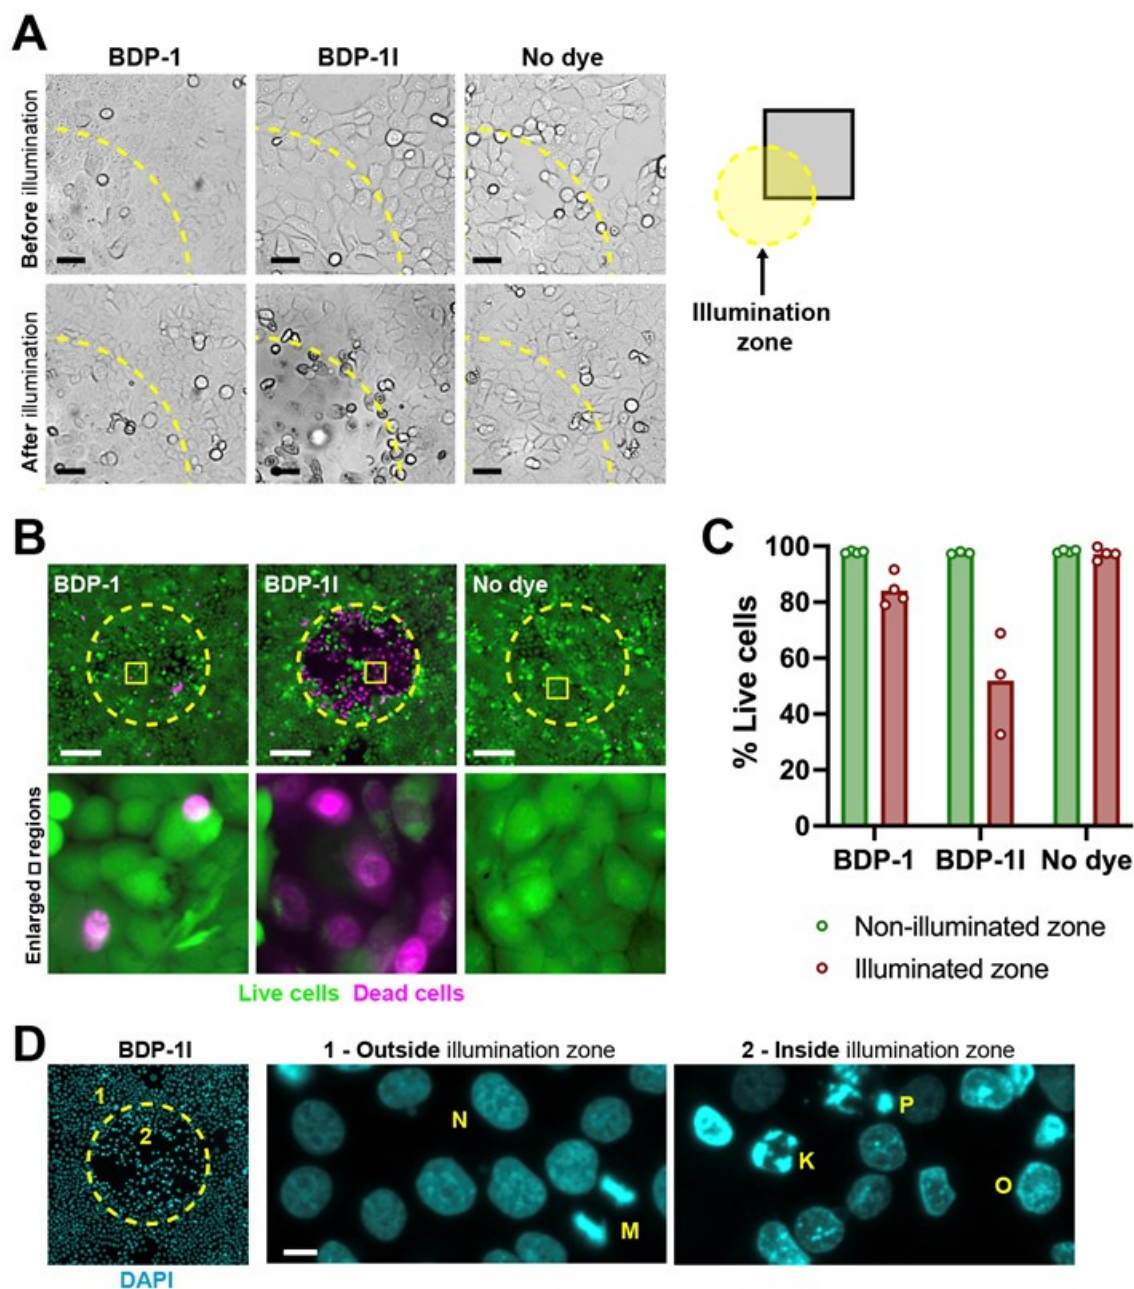

**Fig. S11.** **A** Bright field images of HMT3522-T4 breast cancer cells stained with **BDP-1** or **BDP-1I**, inside and outside the illumination zone. Scale bar, 50  $\mu\text{m}$ . Illumination zones are indicated with dashed lines. **B** Calcein AM (live cells, green) and SYTOX (dead cells, purple) staining of cells treated with **BDP-1**, or **BDP-1I**, or without dye. Scale bar, 200  $\mu\text{m}$ . **C** Quantification of cell viability. Imaging fields had 3000-5000 cells. Each symbol represents an independent illumination zone. **D** Nuclear morphology (DAPI) post-irradiation in cells photosensitized with **BPD-1I**. N, normal interphase nucleus; M, mitotic cell; O, chromatin marginalization; P, pyknosis; K, karyorrhexis. Scale bar, 10  $\mu\text{m}$ .

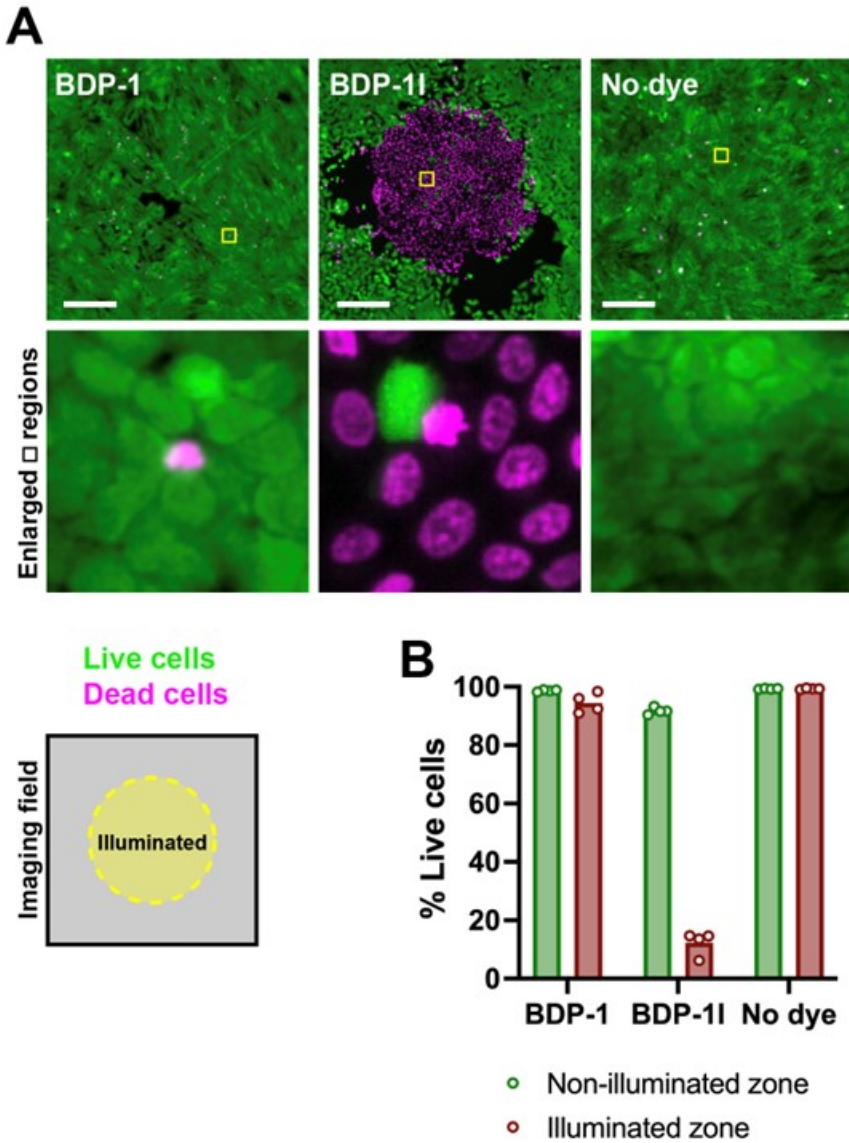

**Fig. S12. A** Images of calcein AM (live cells, green) and SYTOX (dead cells) fluorescence in non-cancerous HMT3522-S1 cells treated with **BDP-1**, or **BDP-1I**, or without dye. Localization of the illumination zone is shown in the schematic. Scale bar, 200  $\mu\text{m}$ . **B** Quantification of cell viability. Imaging fields had 8000-14000 cells. Each symbol represents an independent illumination zone.
